# Supplementary material for: Mek1 coordinates meiotic progression with DNA break repair by directly phosphorylating and inhibiting the yeast pachytene exit regulator Ndt80
Source: PubMed Central journal article supplement (PMC6289461; doi:10.1371/journal.pgen.1007832), 2018-11-29
Supplement: pgen.1007832.s002.pdf [file pgen.1007832.s002.pdf]

**Table S1. Plasmids**

| Plasmid name | Relevant yeast genotype                                            | Source                      |
|--------------|--------------------------------------------------------------------|-----------------------------|
| pACTII       | <i>2<math>\mu</math> LEU2 GAD</i>                                  | (Durfee et al., 1993)       |
| pBTM116      | <i>2<math>\mu</math> lexA TRP1</i>                                 | (Hollenberg et al., 1995)   |
| pSTT91       | <i>2<math>\mu</math> lexA TRP1 ADE2</i>                            | (Woltering et al., 2000)    |
| pRS306       | <i>URA3</i>                                                        | (Sikorski and Hieter, 1989) |
| pRS316       | <i>CEN ARS1 URA3</i>                                               | (Sikorski and Hieter, 1989) |
| pRS316-DMC1  | <i>DMC1 CEN ARS1 URA3</i>                                          | (Niu et al., 2005)          |
| pLW1         | <i>2<math>\mu</math> URA3 P<sub>MEK1</sub><sup>-</sup>GST-MEK1</i> | (Wan et al., 2004)          |
| pTS3         | <i>2<math>\mu</math> TRP1 ADE2 P<sub>ADH1</sub>-lexA-MEK1</i>      | This work                   |
| pTS3-R51A    | <i>2<math>\mu</math> TRP1 ADE2 P<sub>ADH1</sub>-lexA-mek1-R51A</i> | This work                   |

|                   |                                                                                 |                                         |
|-------------------|---------------------------------------------------------------------------------|-----------------------------------------|
| pXC13             | $2\mu$ LEU2 $P_{ADH1}$ -GAD- <i>ndt80</i> <sup>284-627</sup> =GAD- <i>ndt80</i> | This work                               |
| pXC13-KR>AA       | $2\mu$ LEU2 $P_{ADH1}$ -GAD- <i>ndt80</i> -K374A R375A                          | This work                               |
| pXC13-KR>DD       | $2\mu$ LEU2 $P_{ADH1}$ -GAD- <i>ndt80</i> -K374D R375D                          | This work                               |
| pXC14             | $2\mu$ LEU2 $P_{ADH1}$ -GAD- <i>ndt80</i> - $\Delta bc$                         | This work                               |
| pXC18             | $2\mu$ LEU2 $P_{ADH1}$ -GAD- <i>ndt80</i> <sup>346-402</sup> = GAD- <i>bc</i>   | This work                               |
| pNH318            | $2\mu$ LEU2 $P_{ADH1}$ -GAD- <i>ndt80</i> - $\Delta RPSKR$                      | This work                               |
| pDW14             | $2\mu$ LEU2 $P_{MEK1}$                                                          | (de los Santos and Hollingsworth, 1999) |
| pLB1              | $2\mu$ LEU2 $P_{MEK1}$ -GAD- <i>bc</i>                                          | This work                               |
| pHL8              | URA3 NDT80                                                                      | (Lo et al., 2012)                       |
| pHL8-R177A        | URA3 <i>ndt80</i> -R177A                                                        | (Lo et al., 2012)                       |
| pHL8-KR>AA        | URA3 NDT80-K374A R375A                                                          | This work                               |
| pHL8-KR>DD        | URA3 <i>ndt80</i> -K374D R375D                                                  | This work                               |
| pHL8- $\Delta bc$ | URA3 NDT80- $\Delta bc$ = <i>ndt80</i> <sup><math>\Delta</math>346-402</sup>    | This work                               |

|                  |                                                                                                |           |
|------------------|------------------------------------------------------------------------------------------------|-----------|
| pNH317           | <i>URA3 NDT80-ΔRPSKR</i>                                                                       | This work |
| pHL8-2A          | <i>URA3 ndt80-2A = ndt80-T399A T420A</i>                                                       | This work |
| pHL8-4AMS        | <i>URA3 ndt80-4AMS = ndt80-S386A S391A T399A T420A</i>                                         | This work |
| pHL8-5AMS        | <i>URA3 ndt80-5AMS = ndt80-S343A S386A S391A T399A T420A</i>                                   | This work |
| pHL8-7AMS        | <i>URA3 ndt80-7AMS = ndt80-S327A S329A S343A S386A S391A T399A T420A</i>                       | This work |
| pHL8-9AMS        | <i>URA3 ndt80-9AMS = ndt80-S205A T211A S327A S 329A S343A S386A S391A T399A<br/>T420A</i>      | This work |
| pHL8-10AMS       | <i>URA3 ndt80-10AMS = ndt80-S24A S205A T211A S327A S329A S343A S386A S391A<br/>T399A T420A</i> | This work |
| pHL8-10DMS       | <i>URA3 ndt80-10DMS = ndt80-S24D S205D T211D S327D S329D S343D S386D S391D<br/>T399D T420D</i> | This work |
| pNH400           | <i>URA3 ndt80-6A = ndt80-S24A S205A T211A S327A S329A S343A</i>                                | This work |
| pNH405           | <i>URA3 ndt80-8A = ndt80-S24A S205A T211A S327A S329A S343A T399A T420A</i>                    | This work |
| pNH401           | <i>URA3 ndt80-6D = ndt80-S24D S205D T211D S327D S329D S343D</i>                                | This work |
| pHL8-6N          | <i>URA3 ndt80-6N = ndt80-S24N S205N T211N S327N S329N S343N</i>                                | This work |
| pHL8-S24D        | <i>URA3 ndt80-S24D</i>                                                                         | This work |
| pHL8-S343D       | <i>URA3 ndt80-S343D</i>                                                                        | This work |
| pHL8-S205D T211D | <i>URA3 ndt80-S205D T211D</i>                                                                  | This work |
| pHL8-S327D S329D | <i>URA3 ndt80-S327D S329D</i>                                                                  | This work |

|                             |                                                                     |                             |
|-----------------------------|---------------------------------------------------------------------|-----------------------------|
| pBG4                        | <i>URA3 P<sub>GAL1</sub>-NDT80</i>                                  | This work                   |
| pXC11                       | <i>URA3 P<sub>GAL1</sub>-ndt80-6A</i>                               | This work                   |
| pXC12                       | <i>URA3 P<sub>GAL1</sub>-ndt80-6D</i>                               | This work                   |
| pNH407-WT                   | <i>6HIS-ndt80<sup>1-340</sup></i>                                   | This work                   |
| pNH407-5A                   | <i>6HIS-ndt80<sup>1-340</sup>-5A = S24A S205A T211A S327A S329A</i> | This work                   |
| pNH407-5D                   | <i>6HIS-ndt80<sup>1-340</sup>-5D = S24D S205D T211D S327D S329D</i> | This work                   |
| pEP105                      | <i>P<sub>GPD</sub>-GAL4.ER TRP1</i>                                 | (Prugar et al.,<br>2017)    |
| pFA6a-HIS3MX6-<br>PGAL1-GFP | <i>HIS3MX6-P<sub>GAL1</sub>-GFP</i>                                 | (Longtine et<br>al., 1998)  |
| pJR2                        | <i>URA3 mek1-as</i>                                                 | (Callender et<br>al., 2016) |
| pET-28a                     | <i>6His kan<sup>R</sup></i>                                         | Ed Luk<br>(Novagen)         |

Callender, T.L., Laureau, R., Wan, L., Chen, X., Sandhu, R., Laljee, S., Zhou, S., Suhandynata, R.T., Prugar, E., Gaines, W.A., *et al.* (2016). Mek1 down regulates Rad51 activity during yeast meiosis by phosphorylation of Hed1. *PLoS Genet* 12, e1006226.

de los Santos, T., and Hollingsworth, N.M. (1999). Red1p, a *MEK1*-dependent phosphoprotein that physically interacts with Hop1p during meiosis in yeast. *J Biol Chem* 274, 1783-1790.

Durfee, T., Becherer, K., Chen, P.L., Yeh, S.H., Yang, Y., Kilburn, A.E., Lee, W.H., and Elledge, S.J. (1993). The retinoblastoma protein associates with the protein phosphatase type 1 catalytic subunit. *Genes Dev* 7, 555-569.

Hollenberg, S.M., Sternglanz, R., Cheng, P.F., and Weintraub, H. (1995). Identification of a new family of tissue-specific basic helix-loop-helix proteins with a two-hybrid system. *Mol Cell Biol* 15, 3813-3822.

Lo, H.-C., Kunz, R.C., Marullo, A., Gygi, S.P., and Hollingsworth, N.M. (2012). Cdc7-Dbf4 is a gene-specific regulator of meiotic transcription in yeast. *Mol Cell Bio* 32, 541-557.

Longtine, M.S., McKenzie, A., 3rd, Demarini, D.J., Shah, N.G., Wach, A., Brachat, A., Philippsen, P., and Pringle, J.R. (1998). Additional modules for versatile and economical PCR-based gene deletion and modification in *Saccharomyces cerevisiae*. *Yeast* 14, 953-961.

Niu, H., Wan, L., Baumgartner, B., Schaefer, D., Loidl, J., and Hollingsworth, N.M. (2005). Partner choice during meiosis is regulated by Hop1-promoted dimerization of Mek1. *Mol Biol Cell* 16, 5804-5818.

Prugar, E., Burnett, C., Chen, X., and Hollingsworth, N.M. (2017). Coordination of Double Strand Break Repair and Meiotic Progression in Yeast by a Mek1-Ndt80 Negative Feedback Loop. *Genetics* 206, 497-512.

Sikorski, R.S., and Hieter, P. (1989). A system of shuttle vectors and yeast host strains designed for efficient manipulation of DNA in *Saccharomyces cerevisiae*. *Genetics* 122, 19-27.

Wan, L., de los Santos, T., Zhang, C., Shokat, K., and Hollingsworth, N.M. (2004). Mek1 kinase activity functions downstream of *RED1* in the regulation of meiotic double strand break repair in budding yeast. *Mol Biol Cell* 15, 11-23.

Woltering, D., Baumgartner, B., Bagchi, S., Larkin, B., Loidl, J., de los Santos, T., and Hollingsworth, N.M. (2000). Meiotic segregation, synapsis, and recombination checkpoint functions require physical interaction between the chromosomal proteins Red1p and Hop1p. *Mol Cell Biol* 20, 6646-6658.
