# Supplementary material for: Mek1 coordinates meiotic progression with DNA break repair by directly phosphorylating and inhibiting the yeast pachytene exit regulator Ndt80
Source: PubMed Central journal article supplement (PMC6289461; doi:10.1371/journal.pgen.1007832), 2018-11-29
Supplement: pgen.1007832.s003.pdf [file pgen.1007832.s003.pdf]

**Table S2. Oligonucleotides used for plasmid constructions**

| Name                    | Sequence                                             |
|-------------------------|------------------------------------------------------|
| MEK1-lexA-5             | 5'GAAGAAGAGCGGGATCCGACCGTTGTATAGC3'                  |
| MEK1-lexA-3             | 5'GAAAGAGGAAGAGAGGATCCTATGATTAATC3'                  |
| MEK1-R51A-5'            | 5'CATCAGCTCGTGAAAGTTGGGGCAAATGATAAGGAATGTCAACTC3'    |
| MEK1-R51A'3'            | 5'GACTTGACATTCCTTATCATTGCCCCAACTTTCACGAGCTGATG3'     |
| NDT80-GAD-F             | 5'ACGCTAGCTTGGGTGGTCATATGGCCGATCCAGATACCTTTCATGG3'   |
| NDT80-GAD-R             | 5'TCAGTATCTACGATTCATAGATCTCGATGTTCTTATTACAGCAG       |
| NDT80-bc-Cla-R1         | 5'CCCCCTCGAGGTCGACGGTATCGATAACGTTGCTGTGATAATTAATTC3' |
| NDT80-bc-Cla-F2         | 5'GCTTCGAAGGAAATGAGGATC3'                            |
| NDT80-GAD-bc-R2         | 5'TAACGATTTAAAATCATTAGTTTATGACACTCGACGGTGTTCCTCAC3'  |
| NDT80-GAD-bc-F3         | 5'ACGCTAGCTTGGGTGGTCATATGGCCAATTCCTCACAAAACAGC3'     |
| NDT80-N1-R1             | 5'TAACGATTTAAAATCATTAGTTTATTTATTCCATTGGTGTGGATTG3'   |
| NDT80-WT-EcoRI-F1       | 5' TGGATCCCCCGGGCTGCAGGAATTCTAAATAACGGTTTTTACAATGG3' |
| NDT80-GAD-370-R         | 5'TGCATTTAAGCAACTTTCATTTAAC3'                        |
| NDT80-RPSKR $\Delta$ -F | 5'GTAAATGAAAGTTGCTTAAATGCACGATCCAAAGTGGCGCTAGG3'     |
