# Supplementary material for: Mek1 coordinates meiotic progression with DNA break repair by directly phosphorylating and inhibiting the yeast pachytene exit regulator Ndt80
Source: PubMed Central journal article supplement (PMC6289461; doi:10.1371/journal.pgen.1007832), 2018-11-29
Supplement: pgen.1007832.s005.pdf [file pgen.1007832.s005.pdf]

**Table S4. Primary and Secondary antibodies.**

| Protein    | Primary                | dilution  | source              | Secondary            | Dilution | Source             |
|------------|------------------------|-----------|---------------------|----------------------|----------|--------------------|
| Arp7       | $\alpha$ -Arp7         | 1:50,000  | Santa Cruz sc-8961  | $\alpha$ -Goat       | 1:15,000 | Santa Cruz sc-2354 |
| Cdc5       | $\alpha$ -Cdc5 (yC-19) | 1:500     | Santa Cruz sc-6733  | $\alpha$ -Goat       | 1:15,000 | Santa Cruz sc-2354 |
| Clb1       | $\alpha$ -Clb1         | 1:300     | Santa Cruz sc-7647  | $\alpha$ -Goat       | 1:10,000 | Santa Cruz sc-2354 |
| Hed1       | $\alpha$ -Hed1         | 1:50,000  | Patrick Sung        | $\alpha$ -Rabbit     | 1:5,000  | Santa Cruz sc-2357 |
| Hed1 p-T40 | $\alpha$ -pT40         | 1:20,000  | N. M. Hollingsworth | $\alpha$ -Rabbit     | 1:5,000  | Santa Cruz sc-2357 |
| Hop1       | $\alpha$ -Hop1         | 1:10,000  | N. M Hollingsworth  | $\alpha$ -Rabbit     | 1:5,000  | Santa Cruz sc-2357 |
| Red1       | $\alpha$ -GST-Red1     | 1:10,000  | N. M Hollingsworth  | $\alpha$ -Rabbit     | 1:5,000  | Santa Cruz sc-2357 |
| Zip1       | $\alpha$ -Zip1 (y300)  | 1:3,000   | Santa Cruz sc-33733 | $\alpha$ -Rabbit     | 1:50,000 | Santa Cruz sc-2004 |
| HA         | $\alpha$ -HA (12CA5)   | 1:2000    | BABCO               | $\alpha$ -Mouse      | 1:10,000 | Santa Cruz sc-2005 |
| Mek1       | $\alpha$ -Mek1         | 1:20,000  | N. M. Hollingsworth | $\alpha$ -Guinea Pig | 1:10,000 | Santa Cruz sc-2903 |
| Rec8       | $\alpha$ -Mek1         | 1:100,000 | N. M. Hollingsworth | $\alpha$ -Guinea Pig | 1:10,000 | Santa Cruz sc-2903 |
| Ndt80      | $\alpha$ -Ndt80        | 1:15,000  | Michael Lichten     | $\alpha$ -Rabbit     | 1:5,000  | Santa Cruz sc-2357 |
| Rad54      | $\alpha$ -Rad54        | 1:5,000   | Wolf Heyer          | $\alpha$ -Rabbit     | 1:5,000  | Santa Cruz sc-2004 |

|     |               |        |        |                 |         |                    |
|-----|---------------|--------|--------|-----------------|---------|--------------------|
| GAD | $\alpha$ -GAD | 1:2500 | Takara | $\alpha$ -Mouse | 1:10000 | Santa Cruz sc-2005 |
|-----|---------------|--------|--------|-----------------|---------|--------------------|
